# Supplementary material for: Production of raspberry ketone by redirecting the metabolic flux to the phenylpropanoid pathway in tobacco plants
Source: PubMed Central journal article supplement (PMC8346687; doi:10.1016/j.mec.2021.e00180), 2021-07-27
Supplement: mmc2.pdf [file mmc2.pdf]

**Table S1***Oligonucleotide sequences used for the semi-quantitative RT-PCR in this study*

---

| Direction | Primer sequence (5'→3') |
|-----------|-------------------------|
|-----------|-------------------------|

---

**Primers used for semi-quantitative RT-PCR****For *NtACT9***

Forward CTATTCTCCGCTTTGGACTTGGCA

Reverse AGGACCTCAGGACAACGGAAACG

**For *RpBAS***

Forward CATATGGCTACTGAAGAGATGAAG

Reverse TGAGTCTCAGATGGTCCCCTGAA

**For *RiRZS1***

Forward AATAATCGGTTATGGAGTGGCTAGA

Reverse TCCTTAGAGCAGCATCCAGGTCA

**For *AtPAP1***

Forward AACTCTAGAATGGAGGGTTCGTCCAAAGG

Reverse TTCCGAGCTCCTAATCAAATTCACAGTCTCT

**Primers used for quantitative RT-PCR****For *NtEF1α***

Forward CCACACCTCCCACATTGCTGTCA

Reverse CGCATGTCCCTCACAGCAAAAC

**For *RpBAS***

Forward GGGTGCTAGGGTGTGATT

Reverse CAGCACCATCTCCAAGGATAG

**For *RiRZS1***

Forward CACTGATGTGCCTCTCTTAC

Reverse GCCAACAAGCTGACCTACT

**Primers used for full-length *RiRZS1* and *RpBAS* cloning****For *RpBAS***

Forward CATATGGCTACTGAAGAGATGAAG

Reverse TCAAGAGATCACTGGCACAG

**For *RiRZS1***

Forward GCGCGGCAGCCATATGGCGAGTGGTGGAGAAATG

Reverse ACGGAGCTCGAATTCCTCGAGTCACTCTCTGAAACAACCAC

**Primers used for InFusion cloning****For binary vector constructs**

Forward TGCGGCCGCTGGATCGTCCCCAGATTAGCCTTTTC

Reverse CCATGATTACGAATTAATTCCTTATCTTTAATCATATTC

Table S2. Volatile benzenoids and those glycosides in leaves of transgenic tobacco.

| Compound         | Transgenic lines |             |                                    |             |                           |             |                                                  |             |
|------------------|------------------|-------------|------------------------------------|-------------|---------------------------|-------------|--------------------------------------------------|-------------|
|                  | SR1<br>(WT)      |             | <i>RZS1-BAS</i><br><i>-OX</i> (#6) |             | <i>PAP1</i><br><i>-OX</i> |             | <i>RZS1-BAS</i> (#6) x <i>PAP1</i><br><i>-OX</i> |             |
|                  | aglycone         | glycosides  | aglycone                           | glycosides  | aglycone                  | glycosides  | aglycone                                         | glycosides  |
| Benzyl alcohol   | n.d.             | 1.42 ± 0.15 | n.d.                               | 1.62 ± 0.20 | 0.65 ± 0.04               | 1.55 ± 0.54 | 1.02 ± 0.05                                      | 2.94 ± 0.24 |
| 2-Phenylethanol  | n.d.             | 0.32 ± 0.07 | n.d.                               | 0.46 ± 0.07 | n.d.                      | 0.11 ± 0.03 | 0.45 ± 0.03                                      | 0.41 ± 0.05 |
| Raspberry ketone | n.d.             | n.d.        | n.d.                               | n.d.        | n.d.                      | n.d.        | n.d.                                             | 2.24 ± 0.18 |
| Rhododenol       | n.d.             | n.d.        | n.d.                               | n.d.        | n.d.                      | n.d.        | n.d.                                             | 2.29 ± 0.18 |

( $\mu\text{g/gFW}$ )

Table S3. Volatile benzenoids and those glycosides in flowers of transgenic tobacco.

| Compound                | Transgenic lines |             |                                    |             |                           |             |                                                  |             |
|-------------------------|------------------|-------------|------------------------------------|-------------|---------------------------|-------------|--------------------------------------------------|-------------|
|                         | SR1<br>(WT)      |             | <i>RZS1-BAS</i><br><i>-OX</i> (#6) |             | <i>PAP1</i><br><i>-OX</i> |             | <i>RZS1-BAS</i> (#6) x <i>PAP1</i><br><i>-OX</i> |             |
|                         | aglycone         | glycosides  | aglycone                           | glycosides  | aglycone                  | glycosides  | aglycone                                         | glycosides  |
| Benzyl alcohol          | 1.15 ± 0.07      | 4.56 ± 2.95 | 0.98 ± 0.04                        | 0.50 ± 0.03 | 0.38 ± 0.01               | 0.15 ± 0.02 | 0.23 ± 0.02                                      | 0.23 ± 0.09 |
| 4-Hydroxybenzyl alcohol | n.d.             | n.d.        | n.d.                               | n.d.        | n.d.                      | n.d.        | 0.12 ± 0.03                                      | 0.76 ± 0.17 |
| Raspberry ketone        | n.d.             | n.d.        | n.d.                               | 2.38 ± 0.35 | n.d.                      | n.d.        | 0.45 ± 0.04                                      | 4.46 ± 0.21 |
| Rhododenol              | n.d.             | n.d.        | n.d.                               | 0.60 ± 0.09 | n.d.                      | n.d.        | n.d.                                             | 1.78 ± 0.04 |

(µg/gFW)
